# Supplementary material for: Rodent-Borne Orthohantaviruses in Vietnam, Madagascar and Japan
Source: MDPI journal article supplement (doi:10.3390/v13071343), 2021-07-12
Supplement: s1 [file s1]

Supplementary Table S3. GenBank accession numbers and species information for phylogenetic analysis.

| Species                            | Clone         | Country     | CYTB<br>accession number |
|------------------------------------|---------------|-------------|--------------------------|
| <i>Suncus murinus</i>              | NP6362        | Nepal       | MT344840                 |
| <i>Hipposideros pomona</i>         | VN1982B4      | Vietnam     | JX912954                 |
| <i>Eliurus majori</i>              |               | Madagascar  | AF160549                 |
| <i>Stenocephalemys albipes</i>     |               | Ethiopia    | AF518346                 |
| <i>Hylomyscus simus</i>            |               | Guinea      | DQ212188                 |
| <i>Apodemus flavicollis</i>        |               | Greece      | JF819967                 |
| <i>Apodemus peninsulae</i>         |               | South Korea | AB073811                 |
| <i>Apodemus agrarius</i>           |               | South Korea | AB303225                 |
| <i>Apodemus argenteus</i>          | JA5274KTF935  | Japan       | MK410343                 |
| <i>Apodemus speciosus</i>          | UA1818B74     | Japan       | MK410319                 |
| <i>Apodemus speciosus</i>          | JA6557KTF159  | Japan       | MZ356207                 |
| <i>Rattus norvegicus</i>           |               | South Korea | AB355903                 |
| <i>Bandicota indica</i>            |               | Thailand    | KJ592782                 |
| <i>Rattus rattus</i>               | MDG3887MG9    | Madagascar  | LC147016                 |
| <i>Rattus rattus</i>               | MDG4084       | Madagascar  | MZ361584                 |
| <i>Niviventer cf. confucianus</i>  | VN3973        | Vietnam     | MZ356208                 |
| <i>Niviventer cf. confucianus</i>  | VN4004        | Vietnam     | MZ356209                 |
| <i>Niviventer confucianus</i>      |               | China       | KY304471                 |
| <i>Myodes regulus</i>              |               | South Korea | NC_016427                |
| <i>Myodes rufocanus bedfordiae</i> | KT3011KTF49   | Japan       | LC406450                 |
| <i>Myodes rufocanus bedfordiae</i> | KT3028KTF66   | Japan       | MZ356199                 |
| <i>Myodes rufocanus bedfordiae</i> | KT3120KTF116  | Japan       | MZ356200                 |
| <i>Myodes rufocanus bedfordiae</i> | JA4032KTF597  | Japan       | MZ356202                 |
| <i>Myodes rufocanus bedfordiae</i> | JA4034KTF599  | Japan       | MZ356222                 |
| <i>Myodes rufocanus bedfordiae</i> | JA4277KTF-637 | Japan       | MZ356203                 |
| <i>Myodes rufocanus bedfordiae</i> | JA5171KTF862  | Japan       | MZ356204                 |
| <i>Myodes rufocanus bedfordiae</i> | KT5277KTF945  | Japan       | MZ356205                 |
| <i>Myodes rufocanus bedfordiae</i> | JA6551KTF153  | Japan       | MZ356206                 |
| <i>Myodes rufocanus bedfordiae</i> | Kamiiso       | Japan       | LC416891                 |
| <i>Myodes rufocanus bedfordiae</i> | Kitahiyama    | Japan       | AB675420                 |
| <i>Myodes rufocanus</i>            | MrOlhon109    | Russia      | KP859520                 |
| <i>Myodes rufocanus</i>            | AF15465       | Russia      | AY309415                 |
| <i>Myodes glareolus</i>            |               | Finland     | JX477304                 |
| <i>Microtus oeconomus</i>          |               | Russia      | AY305050                 |
| <i>Microtus arvalis</i>            |               | Finland     | AY220770                 |
| <i>Microtus obscurus</i>           |               | China       | MN183143                 |
| <i>Microtus pennsylvanicus</i>     |               | US          | AF119279                 |
| <i>Microtus californicus</i>       |               | US          | AF163891                 |
| <i>Oligoryzomys longicaudatus</i>  |               | Chile       | AF346566                 |
| <i>Peromyscus maniculatus</i>      |               | US          | AF119261                 |
| <i>Eothenomys eleusis</i>          | FG10          | China       | KT899700                 |
| <i>Sigmodon alstoni</i>            | T2140         | Venezuela   | AF293396                 |
| <i>Microtus oeconomus</i>          | 3277_McCarthy |             | AY305153                 |
| <i>Microtus agrestis</i>           | England 5     | England     | AY167191                 |
| <i>Microtus agrestis</i>           | Germany 4     | Germany     | GU563294                 |
