# Supplementary material for: Rodent-Borne Orthohantaviruses in Vietnam, Madagascar and Japan
Source: MDPI journal article supplement (doi:10.3390/v13071343), 2021-07-12
Supplement: s1 [file s1]

Supplementary Table S2. GenBank accession numbers and host information for rodent-borne hantaviruses included in genetic and phylogenetic analysis.

| Virus Name               | Strain Name   | Country    | S segment<br>length for analysis<br>accession no. | M segment<br>length for analysis<br>accession no. | L segment<br>length for analysis<br>accession no. | Host species                       | CYT <sub>B</sub><br>accession no. | COI<br>accession no. |
|--------------------------|---------------|------------|---------------------------------------------------|---------------------------------------------------|---------------------------------------------------|------------------------------------|-----------------------------------|----------------------|
| Hantaan orthohantavirus  | VN3973M589    | Vienam     | 1290-nt<br>MZ343363                               | 2922-nt<br>MZ343364                               | 6456-nt<br>MZ343365                               | <i>Niviventer cf. confucianus</i>  | MZ356208                          | MZ356220             |
| Hantaan orthohantavirus  | VN4004M620    | Vietnam    | 1290-nt<br>MZ343366                               | 3212-nt<br>MZ343367                               | 6456-nt<br>MZ343368                               | <i>Niviventer cf. confucianus</i>  | MZ356209                          | MZ356221             |
| Thailand orthohantavirus | MDG3887MG9    | Madagascar | 1290-nt<br>MZ343360                               | 3402-nt<br>MZ343361                               | 6456-nt<br>MZ343362                               | <i>Rattus rattus</i>               | LC147016                          | MK410392             |
| Puumala orthohantavirus  | JA3011KTF49   | Japan      | 240-nt<br>MZ343341                                | 223-nt<br>MZ505035                                | 2429-nt<br>MZ343342                               | <i>Myodes rufocanus bedfordiae</i> | LC406450                          | MZ356210             |
| Puumala orthohantavirus  | JA3028KTF66   | Japan      | 237-nt<br>MZ343343                                | 223-nt<br>MZ505036                                | 2566-nt<br>MZ343344                               | <i>Myodes rufocanus bedfordiae</i> | MZ356199                          | MZ356211             |
| Puumala orthohantavirus  | JA3120KTF116  | Japan      | 235-nt<br>MZ343345                                | ND                                                | 3602-nt<br>MZ343346                               | <i>Myodes rufocanus bedfordiae</i> | MZ356200                          | MZ356212             |
| Puumala orthohantavirus  | JA3122KTF118  | Japan      | ND                                                | ND                                                | 349-nt<br>MZ343347                                | <i>Myodes rufocanus bedfordiae</i> | MZ356201                          | MZ356213             |
| Puumala orthohantavirus  | JA4032KTF597  | Japan      | 831-nt<br>MZ343348                                | ND                                                | 1169-nt<br>MZ343349                               | <i>Myodes rufocanus bedfordiae</i> | MZ356202                          | MZ356214             |
| Puumala orthohantavirus  | JA4277KTF-637 | Japan      | ND                                                | 223-nt<br>MZ505037                                | 349-nt<br>MZ343350                                | <i>Myodes rufocanus bedfordiae</i> | MZ356203                          | MZ356215             |
| Puumala orthohantavirus  | JA5171KTF862  | Japan      | 220-nt<br>MZ343351                                | ND                                                | 349-nt<br>MZ343352                                | <i>Myodes rufocanus bedfordiae</i> | MZ356204                          | MZ356216             |
| Puumala orthohantavirus  | JA5277KTF945  | Japan      | 231-nt<br>MZ343355                                | ND                                                | 349-nt<br>MZ343356                                | <i>Myodes rufocanus bedfordiae</i> | MZ356205                          | MZ356217             |
| Puumala orthohantavirus  | JA6551KTF153  | Japan      | 704-nt<br>MZ343357                                | 1275-nt<br>MZ505038                               | 1011-nt<br>MZ343358                               | <i>Myodes rufocanus bedfordiae</i> | MZ356206                          | MZ356218             |
| Puumala orthohantavirus  | UA1818B74     | Japan      | 697-nt<br>MZ343339                                | 223-nt<br>MZ505034                                | 2596-nt<br>MZ343340                               | <i>Apodemus speciosus</i>          | MK410319                          | MK410366             |
| Puumala orthohantavirus  | JA6557KTF159  | Japan      | ND                                                | 824-nt<br>MZ343359                                | ND                                                | <i>Apodemus speciosus</i>          | MZ356207                          | MZ356219             |
| Puumala orthohantavirus  | JA5274KTF935  | Japan      | 808-nt<br>MZ343353                                | ND                                                | 375-nt<br>MZ343354                                | <i>Apodemus argenteus</i>          | MK410343                          | MK410423             |

ND: not detected
