# Supplementary material for: Rodent-Borne Orthohantaviruses in Vietnam, Madagascar and Japan
Source: MDPI journal article supplement (doi:10.3390/v13071343), 2021-07-12
Supplement: s1 [file s1]

Supplementary Table S1: Oligonucleotide primers for amplification of the S, M and L segments of rodent-borne hantaviruses

| Primer      | Segment | 5' to 3'                    | Polarity |
|-------------|---------|-----------------------------|----------|
| OSM55       | S/M/L   | TAGTAGTAGACTCC              | +/-      |
| PHS-5endF   | S       | TAGTAGTAGACTCCTTRAARAGC     | +        |
| S437F       | S       | SWGGTCARACTGCHRAYTGG        | +        |
| H4S-509R    | S       | AATCCTTGTCCTTTGTTGTCC       | -        |
| Cro2F       | S       | AGYCCIGTIATGRGWGTIRTYGG     | +        |
| HTN-S4      | S       | GAIGITGTCCACCAACATG         | -        |
| HTS-1032F   | S       | CAGGIATGGCAGARYTIGGIGC      | +        |
| Cro2R       | S       | AIGAYTGRTARAAIGAYTTYTT      | -        |
| JJUVS-1233R | S       | TCACCMAGRTGRAAGTGRTCIAC     | -        |
| HTN-S6      | S       | AGCTCIGGATCCATITCATC        | -        |
| SAS-1248F   | S       | CAYCTKGGTGAYGATATGGAYCC     | +        |
| HTS-3R      | S       | TAGTAGTAIGCTCCYT            | -        |
| Rm-225F     | M       | CCYGARAGTTCTTGTAAYATGG      | +        |
| MG373M-541R | M       | GCKACAATRCARCTYTTTCATC      | -        |
| OSV697F     | M       | GGACCAGGTGCADCTTGGAAGC      | +        |
| MKWM-917R   | M       | TRTCATGATCTTCICCATRTGG      | -        |
| PUUM-1064F  | M       | GATGAYCCTGTRTATRTITGGGC     | +        |
| T-M1199F    | M       | TAAVTTTCAMCAACATGTCT        | +        |
| COM-1257R   | M       | CCICCYTCWGC AAAIGCITCACA    | -        |
| PUUM-1331R  | M       | TYAYTTGYTGYTCWGCACCACG      | -        |
| T-M1485R    | M       | CCAGCCAAARCARAATGT          | -        |
| HTM-1490F   | M       | TGTGTICCWGGITTYCATGGIT      | +        |
| PUUM-2064R  | M       | CCWGDCCATGKGCWGTATCWG       | -        |
| SHM-2371F   | M       | TGYAACCCIGTIGATTGYCCWGG     | +        |
| HTM-2409R   | M       | CCACAIGCWGTRCAICCWGT        | -        |
| MKWM-2631R  | M       | CATGATRTCICCAGGRTCICC       | -        |
| TM-2957R    | M       | GAACCCCADGCCCCITCYAT        | -        |
| SMGM-3142F  | M       | AGRGGTGGACATAGTGGSTC        | +        |
| HTM-3211R   | M       | CCRSWATGICCCICCTTTICC       | -        |
| PHM-3endR   | M       | TAGTAGTAGACTCCGCAAGAA       | +/-      |
| HNL-5F      | L       | TAGTAGTAKACTCCSKRA          | +        |
| SL-513F     | L       | GTIGTIGCAGTIAGGACWGATGG     | +        |
| PUUL-854F   | L       | GGGAGGARGAAGARATMCATGC      | +        |
| CS-L-2319R  | L       | CTTCYTCATTYACATTMCCATG      | -        |
| PUUL-2332R  | L       | TYCTDGCCCAYTCAACYGTYTC      | +        |
| HAN-L-F1    | L       | ATGTAYGTBAGTGCWGATGC        | +        |
| HAN-L-F2    | L       | TGCWGATGCHACIAARTGGTC       | +        |
| HTL-2971R   | L       | CWGGWGACCAYTTIGTDGCATC      | -        |
| HAN-L-R2    | L       | GCRTCRTCWGARTGRTGDGCAA      | -        |
| HAN-L-R1    | L       | AACCADTCWGTYCCRTCATC        | -        |
| RL-3881R    | L       | ATRGACATKGCTCCACTKCCAC      | -        |
| RL-4058R    | L       | CGITCATGYTGAAAI RTNTCATCAGA | -        |
| HNL-4773F   | L       | RGGDACRGCWGAAGCWATWTGTG     | +        |
| CR-L-5461F  | L       | CTGAIKCWGGITTTGARTGGGG      | +        |
| CR-L-6339R  | L       | GAATCAGGWARKACATCTTCHGG     | -        |
| HNL-3R      | L       | TAGTAGTAKGCTCCG             | -        |

Abbreviations: A, Adenine; B, C or G or T; C, Cytosine; D, A or G or T; G, Guanine; H, A or C or T; I, Inosine; K, G or T; M, A or C; N, any nucleotide; R, A or G; S, G or C; T, Thymine; V, A or C or G; W, A or T; Y, C or T.
